# Supplementary material for: Development of new tools to study lipidated mammalian ATG8
Source: Research Square preprint supplement (doi:10.21203/rs.3.rs-221701/v1), 2021-02-16
Supplement: Supplementary file 1 [file 0160cdacb124c3b70da972f8.pdf]

A

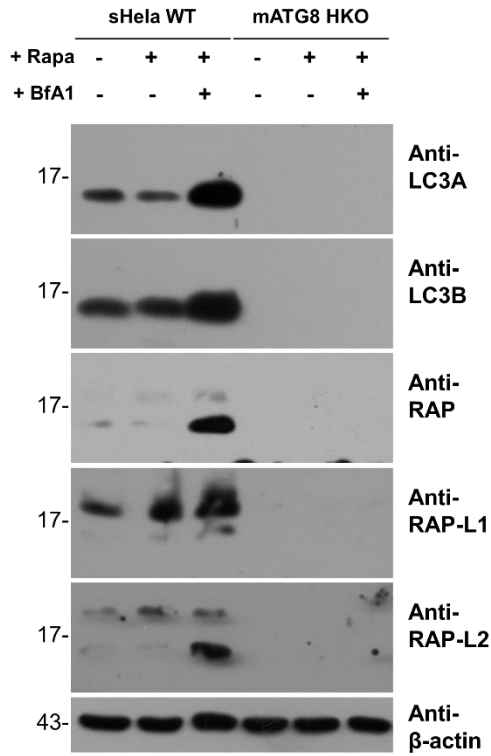

B

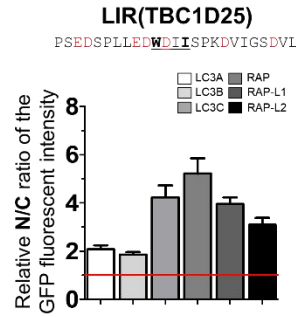

C

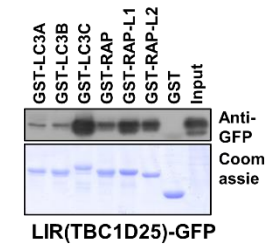

D

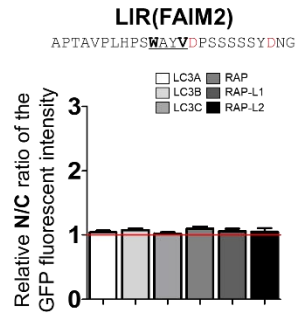

E

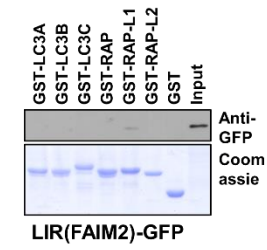

F

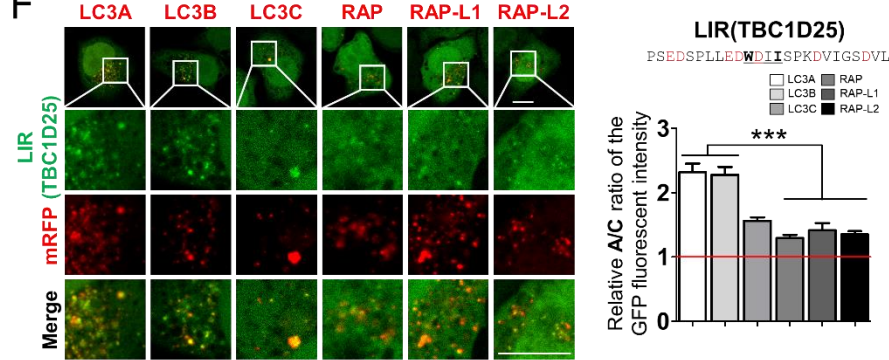

G

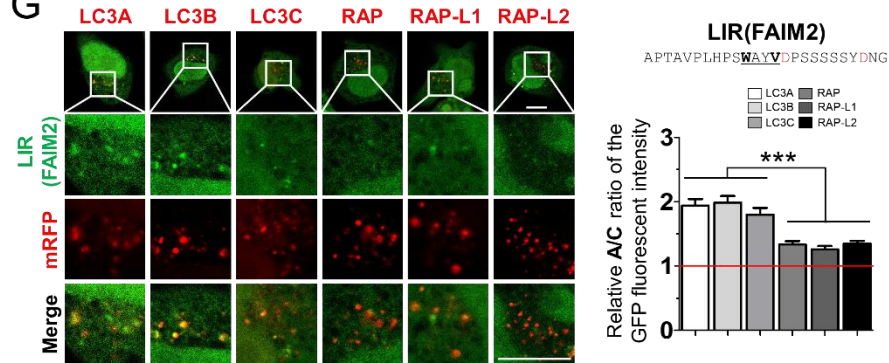

H

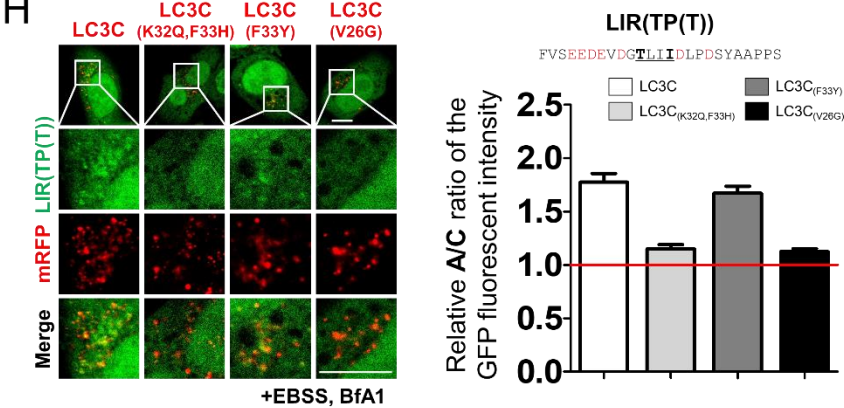

I

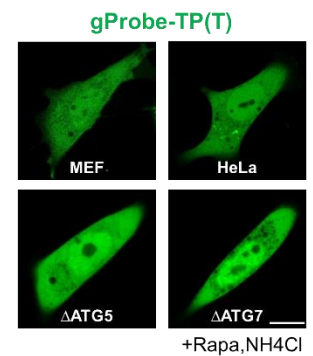

**Figure S1. Characterization of various LIR-containing constructs in HKO cells lacking all mATG8 proteins.** **a**, Autophagic flux assay to verify the presence or absence of mATG8 in HKO cells. HeLa wild-type cells and mATG8 HKO cells were prepared in an untreated group, +Rapa (100 nM, 2 h)-treated group, and +Rapa (100 nM, 2 h) +BafA1 (100 nM, 2 h)-treated group. Each mATG8 protein except LC3C was analyzed by western blot (WB) using the indicated anti-LC3A, -LC3B, -GABARAP, -GABARAP-L1, and -GABARAP-L2 antibodies. **b-g**, LIR motifs with different binding properties for lipidated or non-lipidated mATG8. **b**, Quantification of the N/C ratios of GFP fluorescence in HKO cells expressing LIR(TBC1D25)-mRFP-3xNLS and each GFP-mATG8(GA) ( $n \geq 20$  for each group). **c**, Glutathione S transferase (GST) pull-down assays to analyze the binding of LIR(TBC1D25)-GFP. The coprecipitated LIR(TBC1D25)-GFP protein was analyzed by western blot (WB) using the indicated anti-GFP. **d**, Quantification of the N/C ratio of GFP fluorescence in HKO cells expressing LIR(FAIM2)-mRFP-3xNLS and each GFP-mATG8(GA) ( $n \geq 20$  for each group). **e**, Glutathione S transferase (GST) pull-down assays to analyze the binding of LIR(FAIM2)-GFP. The coprecipitated LIR(FAIM2)-GFP protein was analyzed by western blot (WB) using the indicated anti-GFP antibodies. **f**, Cellular localization of the LIR(TBC1D25)-GFP and each mRFP-mATG8 in HKO cells (left) and quantification of the autophagosome and cytosol (A/C) ratio of GFP fluorescence (right). Values are presented as means + SEM ( $n \geq 20$  for each group). \*\*\* $P < 0.001$ . **g**, Cellular localization of the LIR(FAIM2)-GFP and each mRFP-mATG8 in HKO cells (left) and quantification of the autophagosome and cytosol (A/C) ratio of GFP fluorescence (right). Values are presented as means + SEM ( $n \geq 20$  for each group). \*\*\* $P < 0.001$ . Scale bar: 10  $\mu\text{m}$ . **h**, Effects of the A/C distribution of mRFP-LC3C mutants coexpressed with LIR(TP(T))-GFP. (H) Cellular localization of mRFP-LC3C, mRFP-LC3C(K32Q,F33H), mRFP-LC3C(F33Y,GA), and mRFP-LC3C(V26G) coexpressed with LIR(TP(T))-GFP in HKO cells (Left). Scale bar: 10  $\mu\text{m}$ . Quantification of the relative autophagosome and cytosol (A/C) ratio of GFP fluorescence in cells (Right). Values are presented as means + SEM ( $n \geq 20$  for each group). \*\*\* $P < 0.001$  compared with LC3C-expressing cells. LIR(TP(T)), LIR(TP(T))-GFP. **i**, Detection of LC3C-positive autophagic membranes in wild-type HeLa cells but not in ATG5 or ATG7 KO HeLa cells and MEF cells. Cellular localization of RavZ( $\Delta\text{CA}$ )<sub>TP(T)</sub>-GFP in wild-type HeLa, ATG5(-/-) or ATG7(-/-) HeLa, or MEF cells. Scale bar: 10  $\mu\text{m}$ .

A

## LIR(Sp)

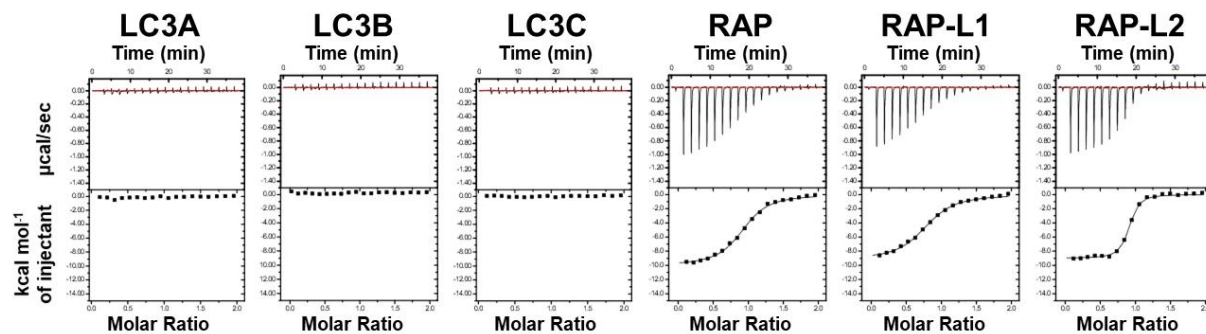Summary of K<sub>d</sub> values (µM) obtained by ITC

| mATG8  | LC3A | LC3B | LC3C | RAP     | RAP-L1  | RAP-L2   |
|--------|------|------|------|---------|---------|----------|
| SpHfl1 | N.D. | N.D. | N.D. | 1.8±0.2 | 2.9±0.2 | 0.24±0.2 |

B

## LIR(TP(T))

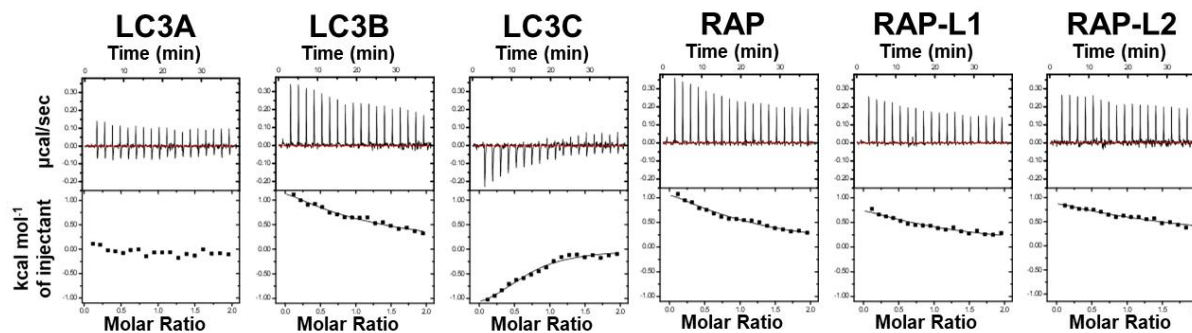Summary of K<sub>d</sub> values (µM) obtained by ITC

| mATG8 | LC3A | LC3B    | LC3C     | RAP    | RAP-L1 | RAP-L2 |
|-------|------|---------|----------|--------|--------|--------|
| TP(T) | N.D. | 228±127 | 26.9±6.9 | 132±17 | 196±33 | 671±97 |

**Figure S2. ITC analysis of LIR(Sp) selective binding to GABARAP-L2 and LIR(TP (T)) selective binding to LC3C. a,** ITC data of mATG8 protein binding to with LIR(Sp). **b,** ITC data of mATG8 protein binding to LIR(TP(T)). RAP, GABARAP; RAP-L1, GABARAP-L1; RAP-L2, GABARAP-L2.

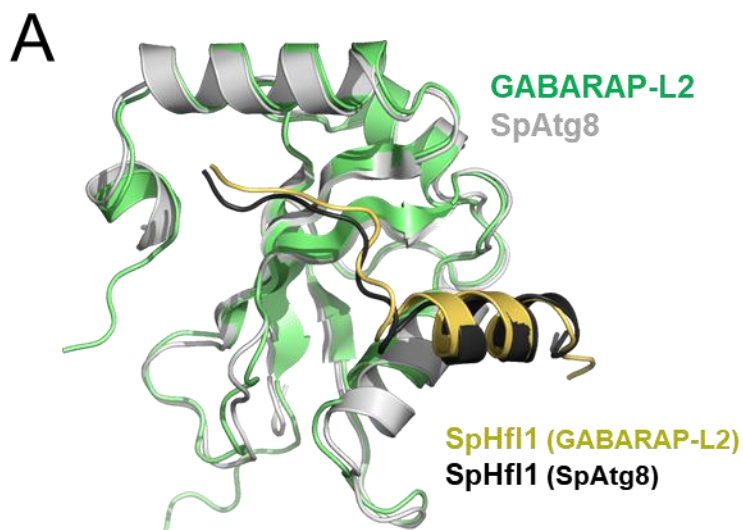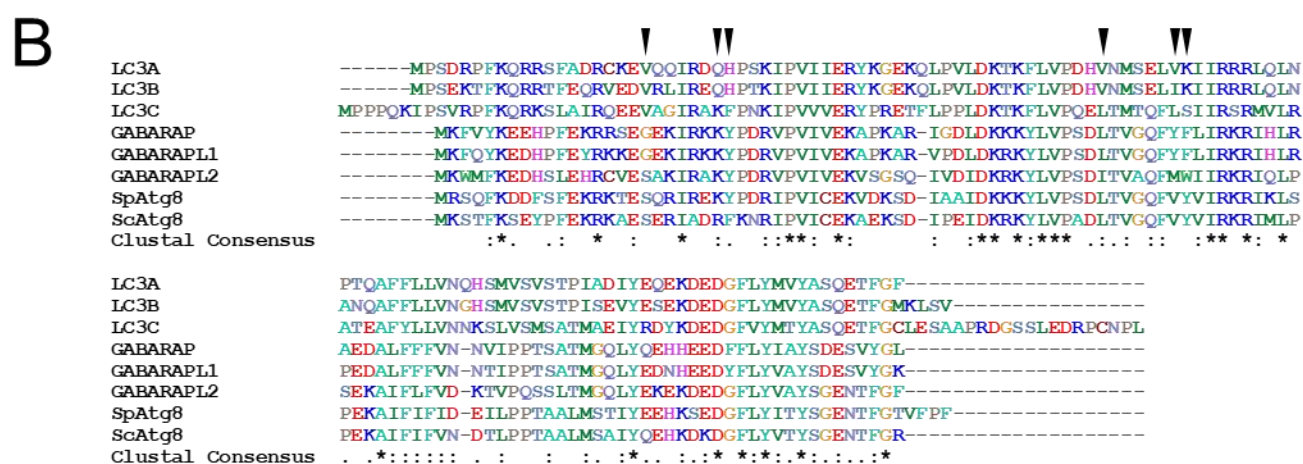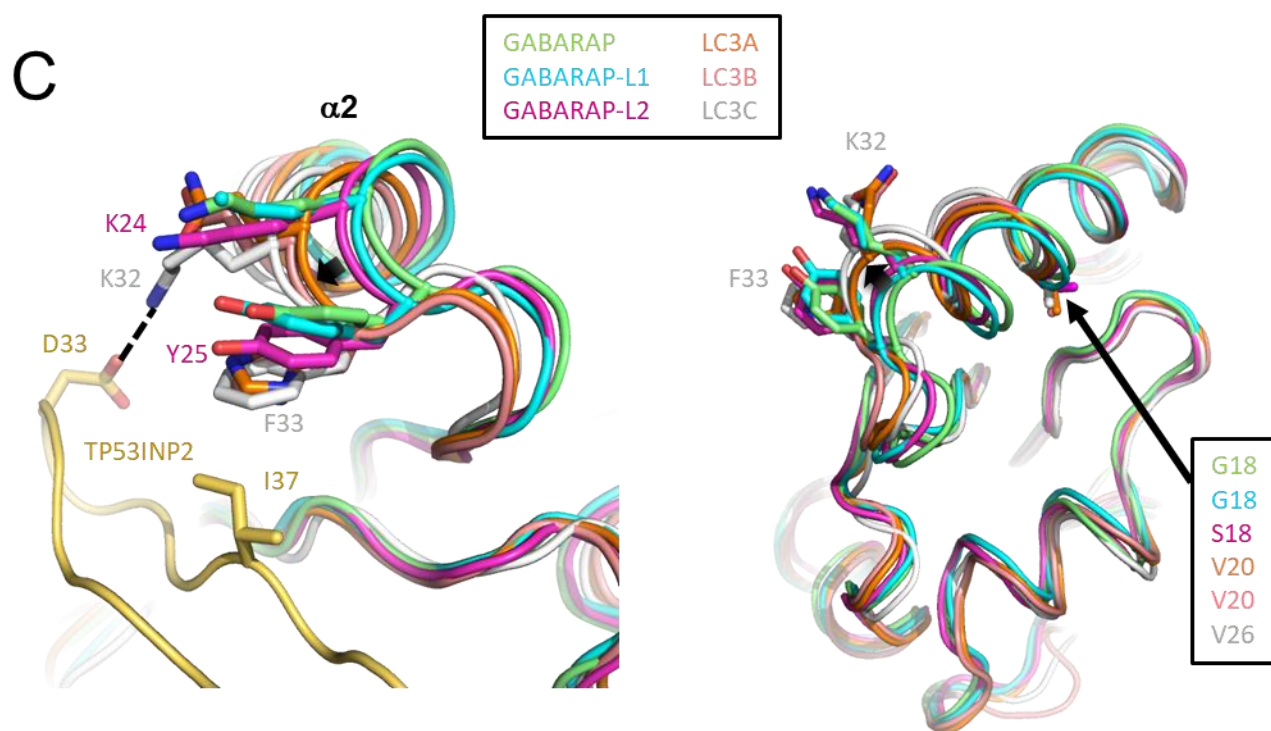

**Figure S3. Residues responsible for specific interactions.** **a**, Structural comparison of SpHfl1 LIR bound to GABARAP-L2 with that bound to SpAtg8 (PDBID 6AAF). The C $\alpha$  atoms were used for superimposition. **b**, Sequence alignment of mATG8 proteins and fungal Atg8 proteins. Arrowheads indicate the residues that were involved in LIR binding but not strictly conserved among mATG8s. **c**, Structural comparison of the  $\alpha$ 2 helix of mATG8s. The C $\alpha$  atoms were used for superimposition. The PDBIDs used were as follows: LC3A, 5CX3; LC3B, 5D94; LC3C, 3VWV; GABARAP, LIR(TP) complex (this study); GABARAP-L1, 6HOI; and GABARAP-L2, SpHfl1 LIR complex (this study).

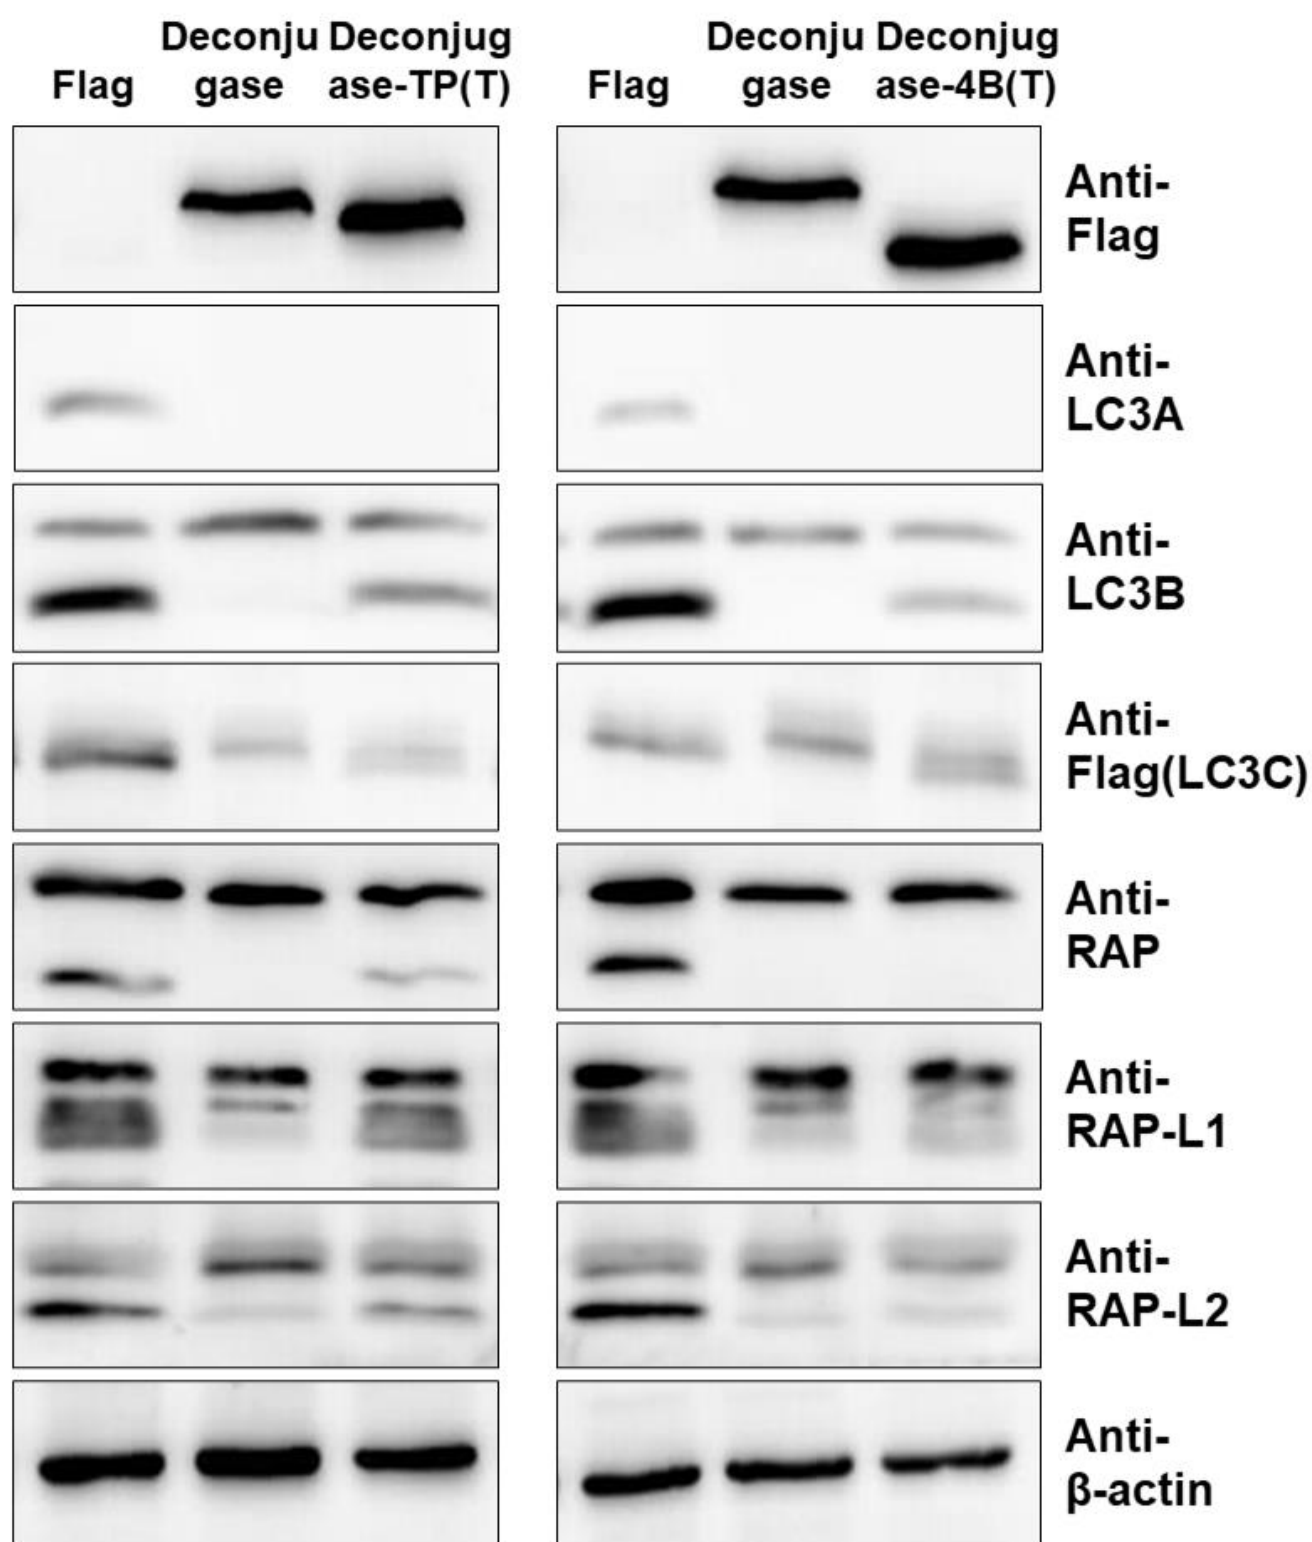

**Figure S4. Non-selective delipidation of endogenous mATG8 by Deconjugase-TP(T) or Deconjugase-4B(T).** Representative western blots of four independent experiments of endogenous mATG8 proteins after expression of Deconjugase-TP(T) and Deconjugase-4B(T) in HEK293T cells upon autophagy induction (100 nM rapamycin [Rapa] for 4 h).



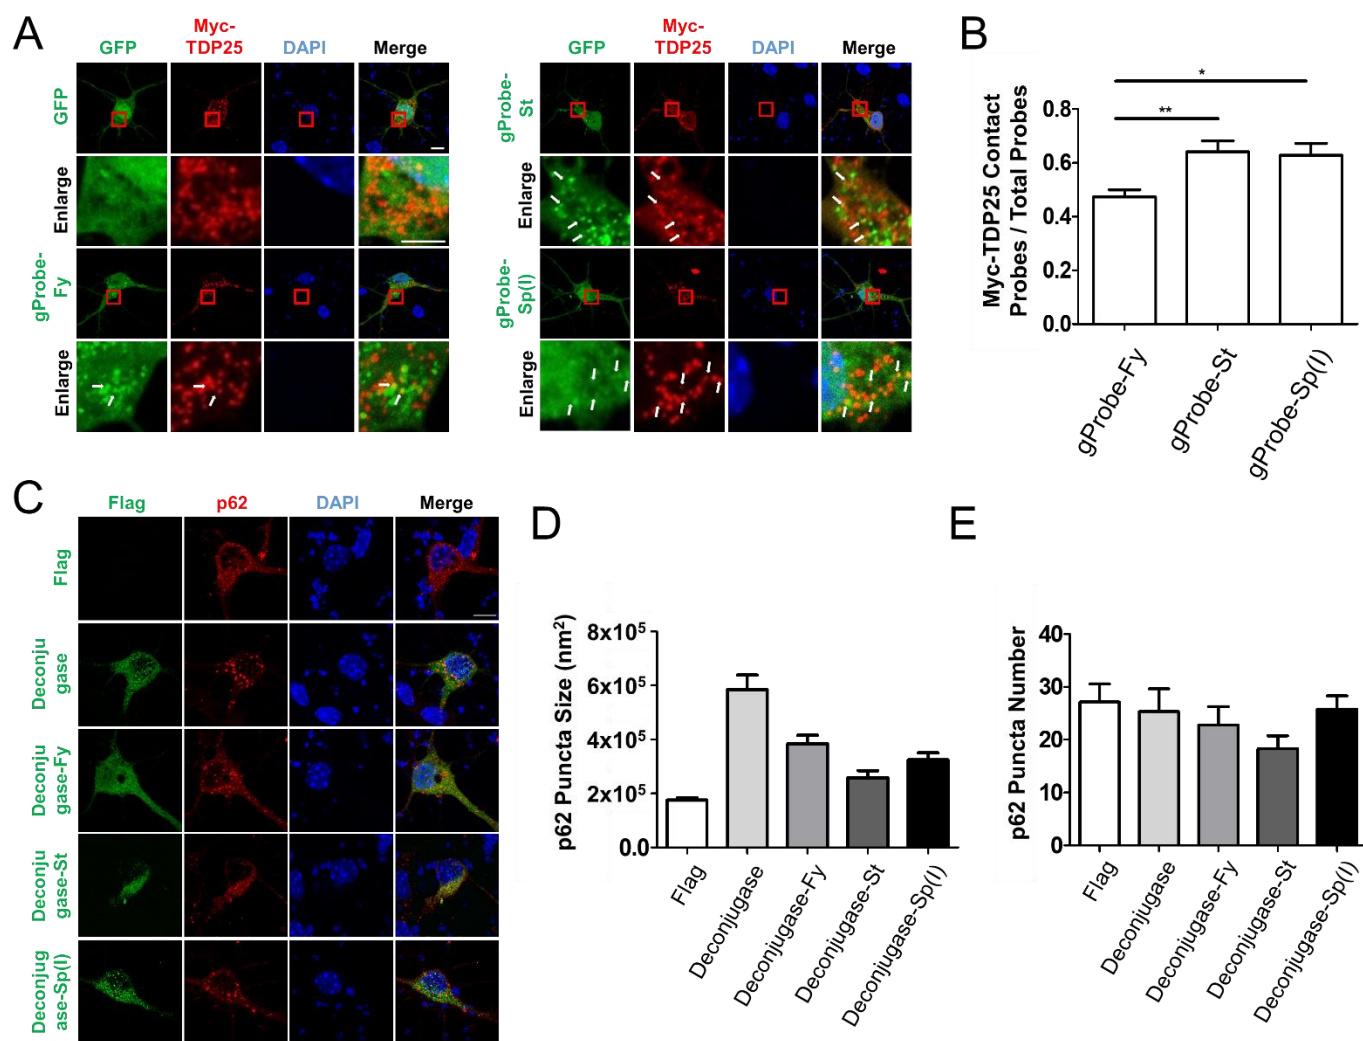

**Figure S5. GABARAP subfamily-positive gProbe-X preferentially associated with TDP25-mediated aggregates, and the p62 puncta size was increased by Deconjugases.** **a**, Cellular localization of Myc-TDP25 aggregates with gProbe-X. GFP empty vector was used as the control. X: Fy, St, and Sp(I). **b**, Quantification of relative Myc-TDP25 aggregates contacting the sensor. Values are presented as means + SEM ( $n \geq 11$  for each group). \* $P < 0.05$ . **c**, Confocal images showing p62 puncta upon expression of Deconjugase-Y in mouse cortical neurons. Y: Fy, 4B(T), St, and Sp(I). **d**, Size of p62 puncta. **e**, Number of p62 puncta (E). Values are presented as means + SEM ( $n \geq 11$  for each group).

**Table S1: Related to Figure 3. Data collection and refinement statistics.**

|                                                      | LIR (SpHfl1) - GABARAL-L2 | LIR (TP53INP2) - GABARAP |
|------------------------------------------------------|---------------------------|--------------------------|
| <b><u>Data collection</u></b>                        |                           |                          |
| Space group                                          | $P4_32_12$                | $P4_1$                   |
| Cell dimensions                                      |                           |                          |
| <i>a</i> , <i>b</i> , <i>c</i> (Å)                   | 45.85 45.85 152.59        | 46.39 46.39 75.40        |
| $\alpha$ , $\beta$ , $\gamma$ (°)                    | 90.0, 90.0, 90.0          | 90.0, 90.0, 90.0         |
| Resolution (Å)                                       | 43.91-1.86 (1.92-1.86)    | 46.39-1.75 (1.81-1.75)   |
| <i>R</i> <sub>sym</sub> or <i>R</i> <sub>merge</sub> | 0.154 (1.071)             | 0.099 (1.061)            |
| <i>I</i> / $\sigma$ <i>I</i>                         | 10.7 (1.7)                | 10.8 (1.3)               |
| Completeness (%)                                     | 99.9 (98.7)               | 99.7 (97.7)              |
| Redundancy                                           | 12.6 (12.3)               | 7.0 (6.9)                |
| CC1/2                                                | 0.996 (0.708)             | 0.994 (0.766)            |
| <b><u>Refinement</u></b>                             |                           |                          |
| Resolution (Å)                                       | 43.91-1.86                | 46.39-1.75               |
| No. reflections                                      | 14553                     | 16066                    |
| <i>R</i> <sub>work</sub> / <i>R</i> <sub>free</sub>  | 0.178/0.198               | 0.185/0.212              |
| No. atoms                                            |                           |                          |
| Protein                                              | 1136                      | 1079                     |
| Ligand                                               | 0                         | 9                        |
| Water                                                | 129                       | 75                       |
| <i>B</i> -factors                                    |                           |                          |
| Protein                                              | 37.2                      | 49.2                     |
| Ligand                                               |                           | 105.7                    |
| Water                                                | 40.7                      | 53.5                     |
| R.m.s. deviations                                    |                           |                          |
| Bond lengths (Å)                                     | 0.007                     | 0.007                    |
| Bond angles (°)                                      | 1.17                      | 1.12                     |

Values in parentheses are for highest-resolution shell.



**Table S2. Summary of the binding property of RavZ( $\Delta$ CA)LIR(X)-EGFP probes to each lipidated mATG8. The A/C ratio: -1.4: - ; 1.4-2.0: +; 2.0-4.0: ++; 4.0: +++**

| Probe        | LC3/GABARAP family interaction        |                                       |                                       |                                       |                                       |                                       |
|--------------|---------------------------------------|---------------------------------------|---------------------------------------|---------------------------------------|---------------------------------------|---------------------------------------|
|              | LC3A                                  | LC3B                                  | LC3C                                  | GABARAP                               | L1                                    | L2                                    |
| gProbe-Sp    | <b>+</b><br>(1.467±0.042,<br>N=31)    | <b>+</b><br>(1.530±0.036,<br>N=30)    | <b>+</b><br>(1.639±0.067,<br>N=30)    | <b>+</b><br>(1.851±0.045,<br>N=30)    | <b>+</b><br>(1.875±0.087,<br>N=31)    | <b>++++</b><br>(5.270±0.205,<br>N=22) |
| gProbe-Sp(I) | <b>-</b><br>(1.130±0.050,<br>N=21)    | <b>-</b><br>(1.183±0.045,<br>N=20)    | <b>-</b><br>(1.289±0.049,<br>N=21)    | <b>-</b><br>(1.306±0.079,<br>N=20)    | <b>-</b><br>(1.234±0.059,<br>N=20)    | <b>++++</b><br>(4.952±0.393,<br>N=20) |
| gProbe-TP(T) | <b>-</b><br>(1.202±0.056,<br>N=20)    | <b>-</b><br>(1.158±0.070,<br>N=22)    | <b>++++</b><br>(4.085±0.322,<br>N=23) | <b>-</b><br>(1.169±0.064,<br>N=20)    | <b>-</b><br>(1.235±0.055,<br>N=20)    | <b>-</b><br>(1.120±0.041,<br>N=21)    |
| gProbe-4B(T) | <b>-</b><br>(1.374±0.058,<br>N=20)    | <b>-</b><br>(1.375±0.055,<br>N=20)    | <b>-</b><br>(1.303±0.072,<br>N=20)    | <b>++++</b><br>(4.666±0.182,<br>N=20) | <b>++++</b><br>(4.886±0.131,<br>N=20) | <b>-</b><br>(1.367±0.050,<br>N=20)    |
| gProbe-Fy    | <b>++++</b><br>(4.898±0.132,<br>N=29) | <b>++++</b><br>(4.657±0.182,<br>N=24) | <b>+</b><br>(1.658±0.066,<br>N=23)    | <b>-</b><br>(1.067±0.033,<br>N=20)    | <b>-</b><br>(0.976±0.033,<br>N=20)    | <b>-</b><br>(1.071±0.041,<br>N=20)    |
| gProbe-St    | <b>-</b><br>(1.249±0.044,<br>N=22)    | <b>-</b><br>(1.249±0.050,<br>N=20)    | <b>-</b><br>(1.279±0.058,<br>N=20)    | <b>++++</b><br>(6.098±0.395,<br>N=22) | <b>++++</b><br>(5.971±0.463,<br>N=22) | <b>++++</b><br>(5.682±0.545,<br>N=20) |
| gProbe-ULK2  | <b>-</b><br>(1.125±0.038,<br>N=21)    | <b>-</b><br>(1.311±0.056,<br>N=21)    | <b>+</b><br>(1.676±0.105,<br>N=22)    | <b>++++</b><br>(5.262±0.261,<br>N=22) | <b>++++</b><br>(5.137±0.160,<br>N=22) | <b>++++</b><br>(4.227±0.262,<br>N=22) |
| gProbe-Nix-p | <b>++</b><br>(2.396±0.125,<br>N=15)   | <b>++</b><br>(2.230±0.126,<br>N=15)   | <b>+</b><br>(1.898±0.127,<br>N=18)    | <b>++</b><br>(2.522±0.161,<br>N=15)   | <b>++++</b><br>(4.539±0.175,<br>N=15) | <b>++</b><br>(2.375±0.129,<br>N=15)   |
